# Supplementary material
Source: Springer Nature journal article supplement (https://www.springermedizin.de/resource/supplementary/12950_2012_293_MOESM10_ESM.pdf/9557504)

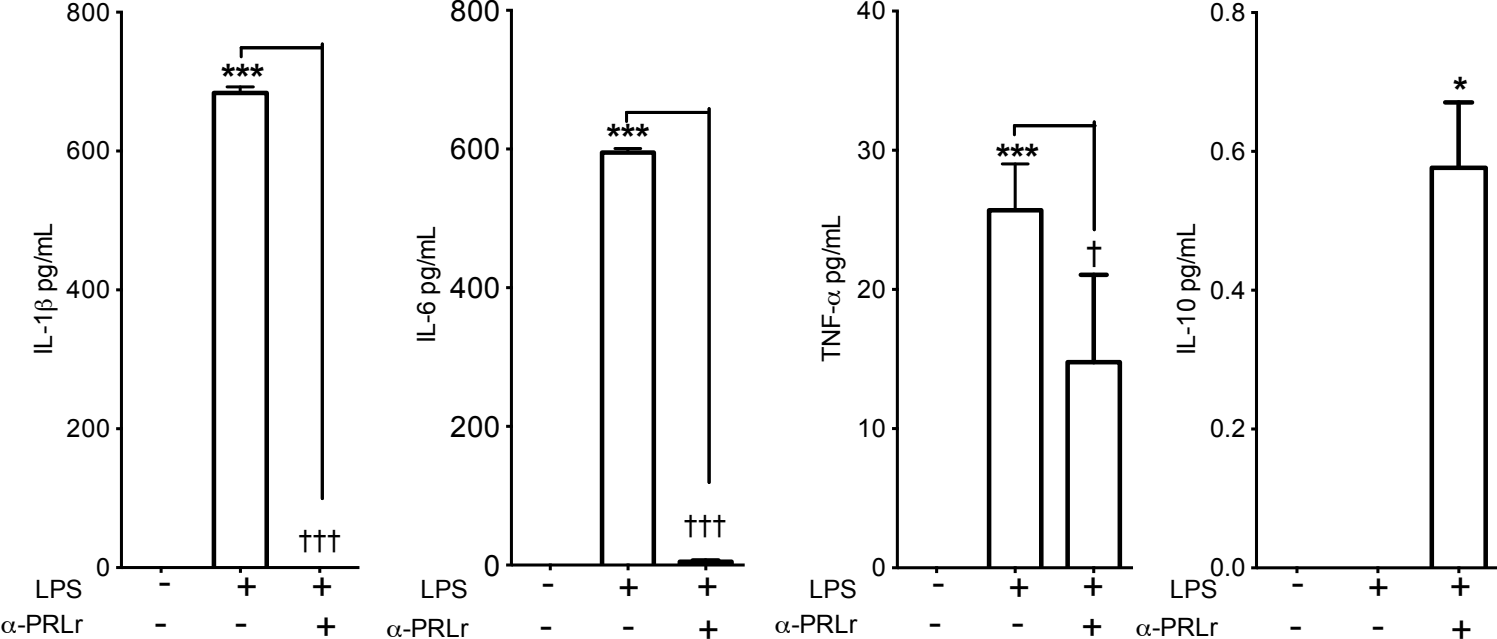

Supplement: MOESM10 [file 9557504]
